# Supplementary material for: How Does In Vitro Digestion Change the Amount of Phenolics in Morus alba L. Leaf? Analysis of Preparations and Infusions
Source: MDPI journal article supplement (doi:10.3390/metabo14010031), 2024-01-01
Supplement: s1 [file s1]

Table S1. Phenolic acid content at different stages of the simulated digestion process of conditioned and non-conditioned *Morus alba* L. leaf preparations [ $\mu\text{g} \times \text{mL}^{-1}$ ].

| Phenolic acids [ $\mu\text{g} \times \text{mL}^{-1}$ ]                                           |     |    | Stages of digestion process |              |              |              |              |              |
|--------------------------------------------------------------------------------------------------|-----|----|-----------------------------|--------------|--------------|--------------|--------------|--------------|
|                                                                                                  |     |    | A                           | B            | C            | D            | E            | F            |
| <div>0h</div> 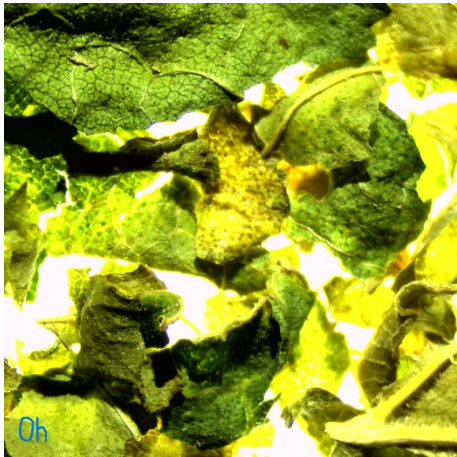 | GAL | SD | 7.96<br>0.03                | 7.35<br>0.07 | 7.42<br>0.02 | 7.32<br>0.00 | 4.59<br>0.01 | 2.72<br>0.02 |
|                                                                                                  | PRO | SD | 0.59<br>0.00                | 0.54<br>0.00 | 0.46<br>0.00 | 0.41<br>0.00 | 0.35<br>0.00 | 0.13<br>0.00 |
|                                                                                                  | HYD | SD | 0.03<br>0.00                | 0.04<br>0.00 | 0.03<br>0.00 | 0.04<br>0.00 | 0.03<br>0.00 | 0.08<br>0.00 |
|                                                                                                  | VAN | SD | 0.03<br>0.00                | 0.04<br>0.00 | 0.05<br>0.00 | 0.07<br>0.00 | 0.07<br>0.00 | 0.09<br>0.00 |
|                                                                                                  | CHL | SD | 2.56<br>0.02                | 2.40<br>0.01 | 1.68<br>0.05 | 1.41<br>0.01 | 0.55<br>0.00 | 0.00<br>0.00 |
|                                                                                                  | CAF | SD | 2.18<br>0.02                | 1.88<br>0.00 | 1.80<br>0.03 | 1.40<br>0.02 | 0.78<br>0.00 | 0.58<br>0.00 |
|                                                                                                  | SYR | SD | 0.04<br>0.00                | 0.03<br>0.00 | 0.02<br>0.00 | 0.01<br>0.00 | 0.01<br>0.00 | 0.00<br>0.00 |
|                                                                                                  | COU | SD | 0.01<br>0.00                | 0.01<br>0.00 | 0.01<br>0.00 | 0.01<br>0.00 | 0.01<br>0.00 | 0.00<br>0.00 |
|                                                                                                  | FER | SD | 0.03<br>0.00                | 0.03<br>0.00 | 0.03<br>0.00 | 0.03<br>0.00 | 0.02<br>0.00 | 0.01<br>0.00 |
|                                                                                                  | SIN | SD | 0.02<br>0.00                | 0.01<br>0.00 | 0.01<br>0.00 | 0.02<br>0.00 | 0.01<br>0.00 | 0.00<br>0.00 |
| 1h                                                                                               | GAL | SD | 3.16<br>0.03                | 3.02<br>0.00 | 6.10<br>0.01 | 4.05<br>0.01 | 5.20<br>0.02 | 5.81<br>0.00 |

|                                                                                   |     |  |      |      |      |      |      |      |
|-----------------------------------------------------------------------------------|-----|--|------|------|------|------|------|------|
|  | PRO |  | 0.13 | 0.12 | 0.14 | 0.11 | 0.07 | 0.03 |
|                                                                                   | SD  |  | 0.00 | 0.00 | 0.00 | 0.00 | 0.00 | 0.00 |
|                                                                                   | HYD |  | 0.00 | 0.00 | 0.02 | 0.01 | 0.01 | 0.04 |
|                                                                                   | SD  |  | 0.00 | 0.00 | 0.00 | 0.00 | 0.00 | 0.00 |
|                                                                                   | VAN |  | 0.01 | 0.01 | 0.03 | 0.02 | 0.02 | 0.05 |
|                                                                                   | SD  |  | 0.00 | 0.00 | 0.00 | 0.00 | 0.00 | 0.00 |
|                                                                                   | CHL |  | 1.18 | 0.96 | 1.00 | 0.32 | 0.37 | 0.10 |
|                                                                                   | SD  |  | 0.00 | 0.00 | 0.04 | 0.00 | 0.00 | 0.00 |
|                                                                                   | CAF |  | 0.68 | 0.55 | 0.99 | 0.76 | 0.62 | 0.85 |
| 2h                                                                                | SD  |  | 0.00 | 0.00 | 0.01 | 0.00 | 0.00 | 0.01 |
|                                                                                   | SYR |  | 0.03 | 0.02 | 0.01 | 0.00 | 0.00 | 0.00 |
|                                                                                   | SD  |  | 0.00 | 0.00 | 0.00 | 0.00 | 0.00 | 0.00 |
|                                                                                   | COU |  | 0.00 | 0.00 | 0.00 | 0.00 | 0.01 | 0.01 |
|                                                                                   | SD  |  | 0.00 | 0.00 | 0.00 | 0.00 | 0.00 | 0.00 |
|                                                                                   | FER |  | 0.02 | 0.02 | 0.03 | 0.02 | 0.02 | 0.02 |
|                                                                                   | SD  |  | 0.00 | 0.00 | 0.00 | 0.00 | 0.00 | 0.00 |
|                                                                                   | SIN |  | 0.01 | 0.00 | 0.01 | 0.01 | 0.01 | 0.01 |
|                                                                                   | SD  |  | 0.00 | 0.00 | 0.00 | 0.00 | 0.00 | 0.00 |
| 2h                                                                                | GAL |  | 2.12 | 2.69 | 2.98 | 3.12 | 4.42 | 4.81 |
|                                                                                   | SD  |  | 0.01 | 0.02 | 0.02 | 0.01 | 0.03 | 0.04 |
|                                                                                   | PRO |  | 0.18 | 0.21 | 0.20 | 0.19 | 0.21 | 0.08 |
|                                                                                   | SD  |  | 0.00 | 0.00 | 0.00 | 0.00 | 0.00 | 0.00 |
|                                                                                   | HYD |  | 0.01 | 0.02 | 0.01 | 0.02 | 0.00 | 0.03 |
| 2h                                                                                | SD  |  | 0.00 | 0.00 | 0.00 | 0.00 | 0.00 | 0.00 |
|                                                                                   | VAN |  | 0.01 | 0.02 | 0.02 | 0.02 | 0.04 | 0.05 |
|                                                                                   | SD  |  | 0.00 | 0.00 | 0.00 | 0.00 | 0.00 | 0.00 |
| 2h                                                                                | CHL |  | 0.91 | 1.16 | 1.03 | 0.90 | 1.14 | 0.43 |
|                                                                                   |     |  |      |      |      |      |      |      |

|                                                                                                    |     |    |              |              |              |              |              |              |
|----------------------------------------------------------------------------------------------------|-----|----|--------------|--------------|--------------|--------------|--------------|--------------|
| <br>2h            | CAF | SD | 0.01         | 0.01         | 0.02         | 0.00         | 0.00         | 0.00         |
|                                                                                                    |     | SD | 0.57<br>0.00 | 0.76<br>0.00 | 0.74<br>0.00 | 0.74<br>0.01 | 1.26<br>0.01 | 1.23<br>0.00 |
|                                                                                                    | SYR | SD | 0.01<br>0.00 | 0.01<br>0.00 | 0.02<br>0.00 | 0.03<br>0.00 | 0.00<br>0.00 | 0.00<br>0.00 |
|                                                                                                    | COU | SD | 0.00<br>0.00 | 0.00<br>0.00 | 0.01<br>0.00 | 0.01<br>0.00 | 0.00<br>0.00 | 0.00<br>0.00 |
|                                                                                                    | FER | SD | 0.01<br>0.00 | 0.01<br>0.00 | 0.01<br>0.00 | 0.01<br>0.00 | 0.02<br>0.00 | 0.01<br>0.00 |
|                                                                                                    | SIN | SD | 0.01<br>0.00 | 0.00<br>0.00 | 0.00<br>0.00 | 0.01<br>0.00 | 0.00<br>0.00 | 0.01<br>0.00 |
| <br>3h<br><br>3h | GAL | SD | 2.08<br>0.00 | 2.98<br>0.01 | 3.13<br>0.02 | 3.68<br>0.00 | 2.86<br>0.01 | 2.35<br>0.01 |
|                                                                                                    | PRO | SD | 0.24<br>0.00 | 0.26<br>0.00 | 0.25<br>0.01 | 0.10<br>0.00 | 0.06<br>0.00 | 0.04<br>0.00 |
|                                                                                                    | HYD | SD | 0.01<br>0.00 | 0.02<br>0.00 | 0.03<br>0.00 | 0.03<br>0.00 | 0.02<br>0.00 | 0.04<br>0.00 |
|                                                                                                    | VAN | SD | 0.00<br>0.00 | 0.03<br>0.00 | 0.02<br>0.00 | 0.03<br>0.00 | 0.03<br>0.00 | 0.04<br>0.00 |
|                                                                                                    | CHL | SD | 0.97<br>0.00 | 1.24<br>0.00 | 1.00<br>0.04 | 0.75<br>0.00 | 0.76<br>0.00 | 0.22<br>0.00 |
|                                                                                                    | CAF | SD | 0.66<br>0.00 | 0.90<br>0.00 | 0.87<br>0.00 | 1.06<br>0.00 | 1.03<br>0.00 | 1.41<br>0.02 |
|                                                                                                    | SYR | SD | 0.01<br>0.00 | 0.03<br>0.00 | 0.01<br>0.00 | 0.01<br>0.00 | 0.01<br>0.00 | 0.00<br>0.00 |
|                                                                                                    | COU | SD | 0.00<br>0.00 | 0.00<br>0.00 | 0.01<br>0.00 | 0.01<br>0.00 | 0.01<br>0.00 | 0.00<br>0.00 |

|                                                                                                  |     |  |      |      |      |      |      |      |
|--------------------------------------------------------------------------------------------------|-----|--|------|------|------|------|------|------|
| <div>4h</div>  | FER |  | 0.01 | 0.02 | 0.01 | 0.02 | 0.01 | 0.01 |
|                                                                                                  | SD  |  | 0.00 | 0.00 | 0.00 | 0.00 | 0.00 | 0.00 |
|                                                                                                  | SIN |  | 0.01 | 0.01 | 0.00 | 0.01 | 0.00 | 0.00 |
|                                                                                                  | SD  |  | 0.00 | 0.00 | 0.00 | 0.00 | 0.00 | 0.00 |
|                                                                                                  | GAL |  | 2.43 | 3.29 | 2.79 | 3.09 | 3.09 | 4.21 |
|                                                                                                  | SD  |  | 0.00 | 0.07 | 0.01 | 0.02 | 0.02 | 0.01 |
|                                                                                                  | PRO |  | 0.23 | 0.28 | 0.20 | 0.22 | 0.20 | 0.05 |
|                                                                                                  | SD  |  | 0.00 | 0.00 | 0.00 | 0.00 | 0.00 | 0.00 |
|                                                                                                  | HYD |  | 0.02 | 0.03 | 0.02 | 0.02 | 0.02 | 0.01 |
|                                                                                                  | SD  |  | 0.00 | 0.00 | 0.00 | 0.00 | 0.00 | 0.00 |
|                                                                                                  | VAN |  | 0.02 | 0.02 | 0.02 | 0.02 | 0.02 | 0.01 |
|                                                                                                  | SD  |  | 0.00 | 0.00 | 0.00 | 0.00 | 0.00 | 0.00 |
|                                                                                                  | CHL |  | 0.71 | 0.98 | 0.77 | 0.72 | 0.62 | 1.07 |
|                                                                                                  | SD  |  | 0.00 | 0.00 | 0.04 | 0.01 | 0.00 | 0.00 |
|                                                                                                  | CAF |  | 0.60 | 0.83 | 0.55 | 0.63 | 0.56 | 0.97 |
|                                                                                                  | SD  |  | 0.01 | 0.00 | 0.00 | 0.00 | 0.00 | 0.00 |
|                                                                                                  | SYR |  | 0.02 | 0.02 | 0.01 | 0.01 | 0.00 | 0.00 |
|                                                                                                  | SD  |  | 0.00 | 0.00 | 0.00 | 0.00 | 0.00 | 0.00 |
|                                                                                                  | COU |  | 0.01 | 0.01 | 0.00 | 0.00 | 0.00 | 0.00 |
|                                                                                                  | SD  |  | 0.00 | 0.00 | 0.00 | 0.00 | 0.00 | 0.00 |
|                                                                                                  | FER |  | 0.01 | 0.01 | 0.01 | 0.01 | 0.01 | 0.01 |
|                                                                                                  | SD  |  | 0.00 | 0.00 | 0.00 | 0.00 | 0.00 | 0.00 |
|                                                                                                  | SIN |  | 0.01 | 0.01 | 0.01 | 0.01 | 0.00 | 0.00 |
|                                                                                                  | SD  |  | 0.00 | 0.00 | 0.00 | 0.00 | 0.00 | 0.00 |

A – sampling at the beginning of stomach stage, B – sampling at the end of stomach stage, C – sampling at the end of duodenum stage, D – sampling at the beginning of small intestine, E – sampling at the end of small intestine, F - sampling at the end of large intestine; GAL - gallic acid, PRO - protocatechuic acid, HYD - 4-hydroxybenzoic acid, VAN - vanillic acid, CHL - chlorogenic acid, CAF - caffeic acid, SYR - syringic acid, COU - *p*-coumaric acid, FER - ferulic acid, SIN - sinapic acid; 0h – *Morus alba* L. leaves non-conditioned, 1h – *Morus alba* L. leaves conditioned for 1 hour, 2h – *Morus alba* L. leaves conditioned for 2 hours, 3h – *Morus alba* L. leaves conditioned for 3 hours, 4h – *Morus alba* L. leaves conditioned for 4 hours; SD – standard deviation.

Table S2. Flavonols content at different stages of the simulated digestion process of conditioned and non-conditioned *Morus alba* L. leaf preparations [ $\mu\text{g} \times \text{mL}^{-1}$ ].

| Flavonols [ $\mu\text{g} \times \text{mL}^{-1}$ ]                                                |     |    | Stages of digestion process |               |               |               |               |               |
|--------------------------------------------------------------------------------------------------|-----|----|-----------------------------|---------------|---------------|---------------|---------------|---------------|
|                                                                                                  |     |    | A                           | B             | C             | D             | E             | F             |
| <div>0h</div> 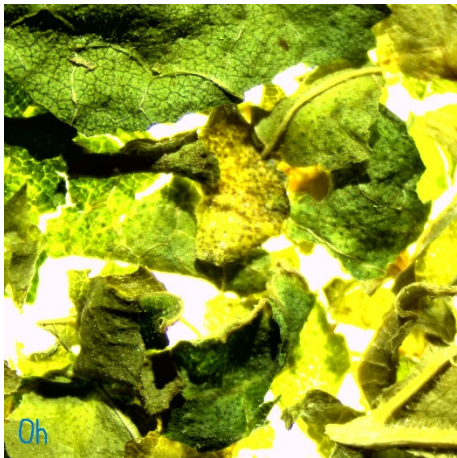 | RUT | SD | 80.81<br>0.01               | 68.86<br>1.01 | 53.33<br>3.07 | 32.94<br>1.85 | 48.61<br>1.28 | 17.66<br>4.28 |
|                                                                                                  | ISQ | SD | 17.63<br>0.03               | 13.42<br>0.28 | 15.12<br>0.99 | 9.11<br>0.74  | 14.65<br>0.38 | 8.66<br>1.27  |
|                                                                                                  | MAL | SD | 78.65<br>0.05               | 54.54<br>0.40 | 46.00<br>2.23 | 33.84<br>2.77 | 43.81<br>0.50 | 22.35<br>0.45 |
|                                                                                                  | AST | SD | 5.41<br>0.02                | 4.16<br>0.25  | 6.00<br>1.06  | 5.34<br>0.65  | 8.24<br>0.98  | 5.58<br>0.75  |
|                                                                                                  | MYR | SD | 12.37<br>0.03               | 10.37<br>0.19 | 14.30<br>0.23 | 11.31<br>0.31 | 11.21<br>0.40 | 0.73<br>0.19  |
|                                                                                                  | QUE | SD | 0.24<br>0.00                | 0.23<br>0.00  | 0.23<br>0.01  | 0.38<br>0.02  | 0.23<br>0.00  | 0.14<br>0.01  |
|                                                                                                  | KEM | SD | 0.18<br>0.00                | 0.15<br>0.01  | 0.22<br>0.05  | 0.18<br>0.01  | 0.19<br>0.01  | 0.19<br>0.06  |
|                                                                                                  | ISR | SD | 0.60<br>0.01                | 0.60<br>0.02  | 0.61<br>0.07  | 0.57<br>0.01  | 0.56<br>0.00  | 0.52<br>0.00  |
|                                                                                                  |     |    |                             |               |               |               |               |               |
| 1h                                                                                               | RUT | SD | 52.95<br>0.43               | 51.65<br>0.05 | 49.86<br>1.56 | 46.76<br>0.31 | 34.62<br>0.35 | 20.63<br>6.75 |
|                                                                                                  | ISQ | SD | 19.37<br>0.45               | 19.82<br>0.05 | 22.89<br>0.10 | 22.03<br>0.37 | 15.82<br>0.18 | 7.02<br>1.55  |
|                                                                                                  | MAL | SD | 55.40<br>0.14               | 53.69<br>0.07 | 65.57<br>0.25 | 75.05<br>1.62 | 54.35<br>0.76 | 34.95<br>2.75 |



|                                                                                                  |     |    |       |       |       |       |       |       |
|--------------------------------------------------------------------------------------------------|-----|----|-------|-------|-------|-------|-------|-------|
|                 | AST |    | 6.01  | 7.92  | 8.57  | 8.57  | 8.11  | 5.85  |
|                                                                                                  |     | SD | 0.33  | 0.06  | 0.25  | 0.16  | 0.05  | 0.27  |
|                                                                                                  | MYR |    | 9.45  | 9.20  | 11.51 | 13.83 | 11.12 | 7.38  |
|                                                                                                  |     | SD | 0.13  | 0.07  | 0.11  | 0.42  | 0.09  | 1.99  |
|                                                                                                  | QUE |    | 0.33  | 0.44  | 0.29  | 0.36  | 0.34  | 0.26  |
|                                                                                                  |     | SD | 0.02  | 0.01  | 0.00  | 0.01  | 0.00  | 0.05  |
| <div>2h</div>  | KEM |    | 0.48  | 0.43  | 0.24  | 0.17  | 0.17  | 0.18  |
|                                                                                                  |     | SD | 0.02  | 0.01  | 0.02  | 0.01  | 0.01  | 0.04  |
|                                                                                                  | ISR |    | 0.66  | 0.61  | 0.65  | 0.56  | 0.58  | 0.55  |
|                                                                                                  |     |    |       |       |       |       |       |       |
|                                                                                                  |     | SD | 0.01  | 0.05  | 0.05  | 0.00  | 0.01  | 0.01  |
|                                                                                                  |     |    |       |       |       |       |       |       |
| <div>2h</div>  | RUT |    | 49.37 | 48.71 | 44.31 | 36.90 | 35.49 | 2.62  |
|                                                                                                  |     | SD | 0.11  | 1.11  | 0.19  | 1.03  | 0.58  | 0.14  |
|                                                                                                  | ISQ |    | 20.13 | 24.67 | 25.46 | 21.27 | 21.73 | 5.25  |
|                                                                                                  |     | SD | 0.17  | 0.01  | 0.25  | 0.92  | 0.77  | 1.69  |
|                                                                                                  | MAL |    | 42.53 | 56.04 | 63.98 | 52.58 | 52.75 | 31.16 |
|                                                                                                  |     | SD | 0.07  | 0.02  | 0.40  | 2.39  | 1.30  | 0.22  |
|                                                                                                  | AST |    | 7.03  | 8.82  | 8.76  | 8.95  | 9.76  | 7.84  |
|                                                                                                  |     | SD | 0.04  | 0.04  | 0.07  | 0.19  | 0.68  | 0.49  |
|                                                                                                  | MYR |    | 6.98  | 9.50  | 11.27 | 9.98  | 9.99  | 3.35  |
| <div>3h</div>                                                                                    |     | SD | 0.05  | 0.07  | 0.12  | 0.28  | 0.12  | 1.03  |
|                                                                                                  | QUE |    | 0.26  | 0.55  | 0.46  | 0.93  | 0.96  | 0.29  |
|                                                                                                  |     | SD | 0.01  | 0.03  | 0.13  | 0.04  | 0.01  | 0.01  |
|                                                                                                  | KEM |    | 0.38  | 0.25  | 0.27  | 0.33  | 0.35  | 0.16  |
|                                                                                                  |     | SD | 0.01  | 0.02  | 0.00  | 0.02  | 0.00  | 0.01  |
|                                                                                                  | ISR |    | 0.66  | 0.66  | 0.78  | 0.68  | 0.57  | 0.61  |
|                                                                                                  |     |    |       |       |       |       |       |       |
|                                                                                                  |     | SD | 0.14  | 0.03  | 0.00  | 0.04  | 0.01  | 0.02  |
|                                                                                                  |     |    |       |       |       |       |       |       |
|                                                                                                  | RUT |    | 33.39 | 39.12 | 25.91 | 26.83 | 33.60 | 11.51 |
|                                                                                                  |     | SD | 0.49  | 0.24  | 0.03  | 0.82  | 4.46  | 0.19  |

|                                                                                                  |     |  |        |        |       |       |       |       |
|--------------------------------------------------------------------------------------------------|-----|--|--------|--------|-------|-------|-------|-------|
|                 | ISQ |  | 11.00  | 14.63  | 11.58 | 12.25 | 17.00 | 18.39 |
|                                                                                                  | SD  |  | 0.09   | 0.03   | 0.03  | 0.04  | 1.34  | 0.19  |
|                                                                                                  | MAL |  | 30.61  | 37.40  | 31.26 | 35.29 | 44.18 | 24.75 |
|                                                                                                  | SD  |  | 0.07   | 0.05   | 0.01  | 0.04  | 1.27  | 0.14  |
|                                                                                                  | AST |  | 4.58   | 6.23   | 5.06  | 5.14  | 4.79  | 6.86  |
|                                                                                                  | SD  |  | 0.12   | 0.01   | 0.01  | 0.04  | 0.10  | 0.09  |
|                                                                                                  | MYR |  | 5.35   | 6.44   | 5.49  | 6.26  | 8.00  | 2.43  |
| <div>4h</div>  | SD  |  | 0.09   | 0.01   | 0.01  | 0.00  | 1.01  | 0.96  |
|                                                                                                  | QUE |  | 0.26   | 0.31   | 0.33  | 0.27  | 0.32  | 0.58  |
|                                                                                                  | SD  |  | 0.00   | 0.01   | 0.00  | 0.01  | 0.02  | 0.02  |
|                                                                                                  | KEM |  | 0.16   | 0.18   | 0.19  | 0.16  | 0.17  | 0.20  |
|                                                                                                  | SD  |  | 0.00   | 0.00   | 0.00  | 0.00  | 0.01  | 0.01  |
|                                                                                                  | ISR |  | 0.58   | 0.59   | 0.57  | 0.56  | 0.55  | 0.55  |
|                                                                                                  | SD  |  | 0.00   | 0.00   | 0.00  | 0.00  | 0.00  | 0.02  |
| <div>4h</div>  | RUT |  | 103.88 | 100.08 | 84.95 | 76.84 | 51.01 | 0.68  |
|                                                                                                  | SD  |  | 0.39   | 0.16   | 4.80  | 0.24  | 0.49  | 0.12  |
|                                                                                                  | ISQ |  | 32.60  | 29.91  | 30.33 | 32.30 | 21.09 | 1.28  |
|                                                                                                  | SD  |  | 0.93   | 1.64   | 2.18  | 1.32  | 1.30  | 0.55  |
|                                                                                                  | MAL |  | 82.12  | 71.73  | 83.36 | 92.47 | 61.34 | 41.88 |
|                                                                                                  | SD  |  | 0.21   | 0.06   | 1.81  | 1.11  | 2.90  | 0.15  |
|                                                                                                  | AST |  | 11.98  | 11.10  | 11.20 | 12.87 | 6.93  | 5.07  |
| <div>4h</div>  | SD  |  | 0.16   | 0.08   | 1.31  | 0.66  | 0.54  | 0.16  |
|                                                                                                  | MYR |  | 13.92  | 13.90  | 15.00 | 19.86 | 15.70 | 1.61  |
|                                                                                                  | SD  |  | 0.09   | 0.08   | 3.19  | 0.63  | 3.12  | 0.31  |
|                                                                                                  | QUE |  | 0.33   | 0.30   | 0.37  | 0.82  | 0.81  | 0.63  |
|                                                                                                  | SD  |  | 0.00   | 0.00   | 0.08  | 0.02  | 0.06  | 0.03  |
|                                                                                                  | KEM |  | 0.18   | 0.17   | 0.19  | 0.32  | 0.41  | 0.16  |
|                                                                                                  | SD  |  | 0.02   | 0.00   | 0.02  | 0.03  | 0.09  | 0.01  |
| <div>4h</div>  | ISR |  | 0.58   | 0.58   | 0.59  | 0.60  | 0.58  | 0.58  |
|                                                                                                  | SD  |  | 0.04   | 0.00   | 0.01  | 0.01  | 0.01  | 0.01  |

A – sampling at the beginning of stomach stage, B – sampling at the end of stomach stage, C – sampling at the end of duodenum stage, D – sampling at the beginning of small intestine, E – sampling at the end of small intestine, F - sampling at the end of large intestine; RUT - rutin, ISQ - isoquercitrin, MAL - quercetin 3-O-(6"-O-malonyl)- $\beta$ -D-glucoside, AST - astragalin, MYR – myricetin, QUE – quercetin, KEM - kaempferol, ISR – isorhamnetin; 0h - *Morus alba* L. leaves non-conditioned, 1h – *Morus alba* L. leaves conditioned for 1 hour, 2h – *Morus alba* L. leaves conditioned for 2 hours, 3h – *Morus alba* L. leaves conditioned for 3 hours, 4h – *Morus alba* L. leaves conditioned for 4 hours.; SD – standard deviation.



Table S3. Phenolic acid content at different stages of the simulated digestion process of infusions of conditioned and non-conditioned *Morus alba* L. leaves [ $\mu\text{g} \times \text{mL}^{-1}$ ].

| Phenolic acids [ $\mu\text{g} \times \text{mL}^{-1}$ ]                                   |     | Stages of digestion process |      |      |      |      |      |
|------------------------------------------------------------------------------------------|-----|-----------------------------|------|------|------|------|------|
|                                                                                          |     | A                           | B    | C    | D    | E    | F    |
| ON<br> | GAL | 0.60                        | 0.73 | 1.05 | 2.68 | 2.31 | 2.74 |
|                                                                                          | SD  | 0.00                        | 0.00 | 0.00 | 0.02 | 0.02 | 0.00 |
|                                                                                          | PRO | 0.07                        | 0.09 | 0.10 | 0.14 | 0.10 | 0.02 |
|                                                                                          | SD  | 0.00                        | 0.00 | 0.00 | 0.01 | 0.00 | 0.00 |
|                                                                                          | HYD | 0.00                        | 0.00 | 0.00 | 0.00 | 0.00 | 0.01 |
|                                                                                          | SD  | 0.00                        | 0.00 | 0.00 | 0.00 | 0.00 | 0.00 |
|                                                                                          | VAN | 0.00                        | 0.00 | 0.00 | 0.00 | 0.01 | 0.02 |
|                                                                                          | SD  | 0.00                        | 0.00 | 0.00 | 0.00 | 0.00 | 0.00 |
|                                                                                          | CHL | 0.34                        | 0.41 | 0.36 | 0.26 | 0.24 | 0.09 |
|                                                                                          | SD  | 0.01                        | 0.01 | 0.00 | 0.00 | 0.00 | 0.00 |
| 1N                                                                                       | CAF | 0.52                        | 0.61 | 0.56 | 0.55 | 0.52 | 0.51 |
|                                                                                          | SD  | 0.01                        | 0.00 | 0.01 | 0.02 | 0.01 | 0.02 |
|                                                                                          | SYR | 0.00                        | 0.00 | 0.01 | 0.00 | 0.00 | 0.00 |
|                                                                                          | SD  | 0.00                        | 0.00 | 0.00 | 0.00 | 0.00 | 0.00 |
|                                                                                          | COU | 0.01                        | 0.01 | 0.01 | 0.01 | 0.01 | 0.00 |
|                                                                                          | SD  | 0.00                        | 0.00 | 0.00 | 0.00 | 0.00 | 0.00 |
|                                                                                          | FER | 0.01                        | 0.01 | 0.01 | 0.01 | 0.01 | 0.01 |
|                                                                                          | SD  | 0.00                        | 0.00 | 0.00 | 0.00 | 0.00 | 0.00 |
|                                                                                          | SIN | 0.00                        | 0.00 | 0.01 | 0.00 | 0.00 | 0.00 |
|                                                                                          | SD  | 0.00                        | 0.00 | 0.00 | 0.00 | 0.00 | 0.00 |
| 1N                                                                                       | GAL | 1.26                        | 0.55 | 1.15 | 2.04 | 2.14 | 2.05 |
|                                                                                          | SD  | 0.01                        | 0.01 | 0.01 | 0.00 | 0.00 | 0.01 |
|                                                                                          | PRO | 0.05                        | 0.01 | 0.07 | 0.06 | 0.08 | 0.03 |
|                                                                                          | SD  | 0.00                        | 0.00 | 0.00 | 0.00 | 0.00 | 0.00 |
| 1N                                                                                       | HYD | 0.00                        | 0.00 | 0.00 | 0.00 | 0.00 | 0.00 |
|                                                                                          | SD  | 0.00                        | 0.00 | 0.00 | 0.00 | 0.00 | 0.00 |
| 1N                                                                                       | VAN | 0.00                        | 0.00 | 0.00 | 0.00 | 0.00 | 0.00 |
|                                                                                          | SD  | 0.00                        | 0.00 | 0.00 | 0.00 | 0.00 | 0.00 |

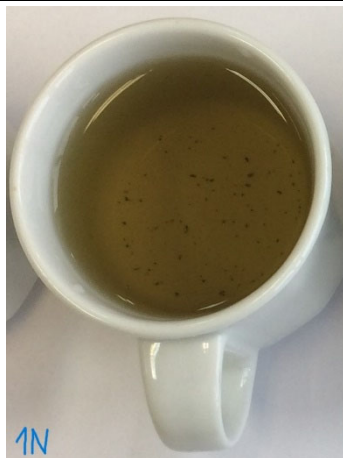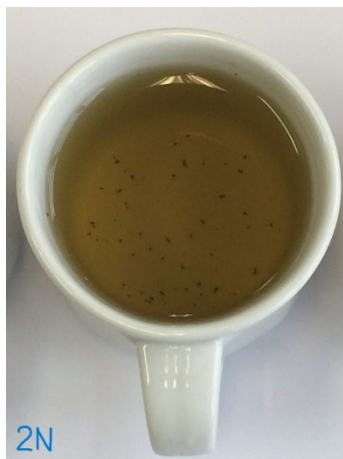

2N

|     |    |      |      |      |      |      |      |
|-----|----|------|------|------|------|------|------|
|     | SD | 0.00 | 0.00 | 0.00 | 0.00 | 0.00 | 0.00 |
| CHL |    | 0.40 | 0.20 | 0.42 | 0.29 | 0.32 | 0.19 |
|     | SD | 0.01 | 0.01 | 0.00 | 0.00 | 0.01 | 0.00 |
| CAF |    | 0.42 | 0.20 | 0.46 | 0.45 | 0.45 | 0.58 |
|     | SD | 0.00 | 0.00 | 0.02 | 0.00 | 0.02 | 0.03 |
| SYR |    | 0.01 | 0.01 | 0.01 | 0.00 | 0.00 | 0.00 |
|     | SD | 0.00 | 0.00 | 0.00 | 0.00 | 0.00 | 0.00 |
| COU |    | 0.01 | 0.00 | 0.00 | 0.00 | 0.00 | 0.00 |
|     | SD | 0.00 | 0.00 | 0.00 | 0.00 | 0.00 | 0.00 |
| FER |    | 0.01 | 0.01 | 0.01 | 0.01 | 0.01 | 0.01 |
|     | SD | 0.00 | 0.00 | 0.00 | 0.00 | 0.00 | 0.00 |
| SIN |    | 0.00 | 0.00 | 0.00 | 0.00 | 0.00 | 0.00 |
|     | SD | 0.00 | 0.00 | 0.00 | 0.00 | 0.00 | 0.00 |
| GAL |    | 0.19 | 0.85 | 1.24 | 1.85 | 2.48 | 2.24 |
|     | SD | 0.00 | 0.01 | 0.01 | 0.01 | 0.14 | 0.08 |
| PRO |    | 0.00 | 0.07 | 0.10 | 0.01 | 0.01 | 0.00 |
|     | SD | 0.00 | 0.01 | 0.00 | 0.00 | 0.00 | 0.00 |
| HYD |    | 0.00 | 0.00 | 0.00 | 0.00 | 0.00 | 0.01 |
|     | SD | 0.00 | 0.00 | 0.00 | 0.00 | 0.00 | 0.00 |
| VAN |    | 0.00 | 0.00 | 0.01 | 0.00 | 0.00 | 0.00 |
|     | SD | 0.00 | 0.00 | 0.00 | 0.00 | 0.00 | 0.00 |
| CHL |    | 0.12 | 0.34 | 0.24 | 0.11 | 0.11 | 0.05 |
|     | SD | 0.00 | 0.01 | 0.00 | 0.00 | 0.00 | 0.00 |
| CAF |    | 0.12 | 0.42 | 0.80 | 0.42 | 0.51 | 0.35 |
|     | SD | 0.00 | 0.00 | 0.00 | 0.01 | 0.01 | 0.01 |
| SYR |    | 0.00 | 0.00 | 0.00 | 0.00 | 0.00 | 0.00 |
|     | SD | 0.00 | 0.00 | 0.00 | 0.00 | 0.00 | 0.00 |
| COU |    | 0.00 | 0.00 | 0.01 | 0.00 | 0.01 | 0.00 |
|     | SD | 0.00 | 0.00 | 0.00 | 0.00 | 0.00 | 0.00 |
| FER |    | 0.01 | 0.01 | 0.01 | 0.01 | 0.01 | 0.01 |
|     | SD | 0.00 | 0.00 | 0.00 | 0.00 | 0.00 | 0.00 |
| SIN |    | 0.00 | 0.00 | 0.00 | 0.00 | 0.00 | 0.00 |
|     | SD | 0.00 | 0.00 | 0.00 | 0.00 | 0.00 | 0.00 |

|                                                                                                 |     |      |      |      |      |      |      |
|-------------------------------------------------------------------------------------------------|-----|------|------|------|------|------|------|
| <div>3N</div>  | GAL | 0.20 | 0.73 | 1.04 | 2.34 | 2.41 | 3.49 |
|                                                                                                 | SD  | 0.01 | 0.01 | 0.04 | 0.03 | 0.05 | 0.10 |
|                                                                                                 | PRO | 0.06 | 0.06 | 0.07 | 0.01 | 0.03 | 0.00 |
|                                                                                                 | SD  | 0.00 | 0.00 | 0.00 | 0.00 | 0.00 | 0.00 |
|                                                                                                 | HYD | 0.01 | 0.01 | 0.00 | 0.01 | 0.01 | 0.01 |
|                                                                                                 | SD  | 0.00 | 0.00 | 0.00 | 0.00 | 0.00 | 0.00 |
|                                                                                                 | VAN | 0.00 | 0.00 | 0.00 | 0.00 | 0.00 | 0.01 |
|                                                                                                 | SD  | 0.00 | 0.00 | 0.00 | 0.00 | 0.00 | 0.00 |
|                                                                                                 | CHL | 0.25 | 0.26 | 0.22 | 0.13 | 0.12 | 0.07 |
|                                                                                                 | SD  | 0.00 | 0.00 | 0.00 | 0.00 | 0.00 | 0.00 |
|                                                                                                 | CAF | 0.26 | 0.28 | 0.30 | 0.27 | 0.29 | 0.39 |
|                                                                                                 | SD  | 0.00 | 0.01 | 0.01 | 0.00 | 0.00 | 0.01 |
| <div>4N</div>                                                                                   | SYR | 0.00 | 0.00 | 0.00 | 0.00 | 0.00 | 0.00 |
|                                                                                                 | SD  | 0.00 | 0.00 | 0.00 | 0.00 | 0.00 | 0.00 |
|                                                                                                 | COU | 0.00 | 0.00 | 0.00 | 0.00 | 0.00 | 0.00 |
|                                                                                                 | SD  | 0.00 | 0.00 | 0.00 | 0.00 | 0.00 | 0.00 |
|                                                                                                 | FER | 0.01 | 0.01 | 0.01 | 0.00 | 0.01 | 0.01 |
|                                                                                                 | SD  | 0.00 | 0.00 | 0.00 | 0.00 | 0.00 | 0.00 |
|                                                                                                 | SIN | 0.00 | 0.00 | 0.00 | 0.00 | 0.00 | 0.00 |
|                                                                                                 | SD  | 0.00 | 0.00 | 0.00 | 0.00 | 0.00 | 0.00 |
|                                                                                                 | GAL | 0.00 | 0.31 | 0.18 | 2.43 | 2.31 | 0.79 |
|                                                                                                 | SD  | 0.00 | 0.01 | 0.01 | 0.02 | 0.03 | 0.00 |
|                                                                                                 | PRO | 0.00 | 0.02 | 0.00 | 0.00 | 0.01 | 0.00 |
|                                                                                                 | SD  | 0.00 | 0.00 | 0.00 | 0.00 | 0.00 | 0.00 |
|                                                                                                 | HYD | 0.00 | 0.00 | 0.00 | 0.00 | 0.00 | 0.00 |
|                                                                                                 | SD  | 0.00 | 0.00 | 0.00 | 0.00 | 0.00 | 0.00 |
|                                                                                                 | VAN | 0.00 | 0.00 | 0.00 | 0.00 | 0.01 | 0.01 |
|                                                                                                 | SD  | 0.00 | 0.00 | 0.00 | 0.00 | 0.00 | 0.00 |
|                                                                                                 | CHL | 0.02 | 0.17 | 0.06 | 0.13 | 0.12 | 0.01 |
|                                                                                                 | SD  | 0.00 | 0.00 | 0.00 | 0.00 | 0.00 | 0.00 |
|                                                                                                 | CAF | 0.02 | 0.16 | 0.06 | 0.20 | 0.21 | 0.05 |
|                                                                                                 | SD  | 0.00 | 0.01 | 0.00 | 0.00 | 0.00 | 0.00 |

|                                                                                   |  |     |      |      |      |      |      |      |
|-----------------------------------------------------------------------------------|--|-----|------|------|------|------|------|------|
|  |  | SYR | 0.00 | 0.00 | 0.00 | 0.00 | 0.00 | 0.00 |
|                                                                                   |  | SD  | 0.00 | 0.00 | 0.00 | 0.00 | 0.00 | 0.00 |
|                                                                                   |  | COU | 0.00 | 0.00 | 0.00 | 0.00 | 0.00 | 0.00 |
|                                                                                   |  | SD  | 0.00 | 0.00 | 0.00 | 0.00 | 0.00 | 0.00 |
|                                                                                   |  | FER | 0.00 | 0.01 | 0.00 | 0.00 | 0.00 | 0.00 |
|                                                                                   |  | SD  | 0.00 | 0.00 | 0.00 | 0.00 | 0.00 | 0.00 |
|                                                                                   |  | SIN | 0.00 | 0.00 | 0.00 | 0.00 | 0.00 | 0.00 |
|                                                                                   |  | SD  | 0.00 | 0.00 | 0.00 | 0.00 | 0.00 | 0.00 |

Table S4. Flavonols content at different stages of the simulated digestion process of infusions of conditioned and non-conditioned *Morus alba* L. leaves [ $\mu\text{g} \times \text{mL}^{-1}$ ].

| Flavonols [ $\mu\text{g} \times \text{mL}^{-1}$ ]                                           |     |    | Stages of digestion process |       |       |       |       |       |
|---------------------------------------------------------------------------------------------|-----|----|-----------------------------|-------|-------|-------|-------|-------|
|                                                                                             |     |    | A                           | B     | C     | D     | E     | F     |
| <p>ON</p>  | RUT |    | 14.62                       | 16.53 | 13.93 | 9.32  | 7.83  | 7.01  |
|                                                                                             |     | SD | 0.12                        | 0.39  | 0.10  | 0.09  | 0.13  | 0.08  |
|                                                                                             | KEM |    | 0.28                        | 0.24  | 0.24  | 0.24  | 0.21  | 0.21  |
|                                                                                             |     | SD | 0.01                        | 0.02  | 0.00  | 0.00  | 0.01  | 0.00  |
|                                                                                             | ISQ |    | 5.87                        | 6.38  | 5.76  | 3.86  | 3.18  | 0.27  |
|                                                                                             |     | SD | 0.20                        | 0.10  | 0.02  | 0.02  | 0.06  | 0.00  |
|                                                                                             | MAL |    | 14.81                       | 16.70 | 16.61 | 11.52 | 9.48  | 6.76  |
|                                                                                             |     | SD | 0.67                        | 0.32  | 0.23  | 0.25  | 0.11  | 0.18  |
|                                                                                             | AST |    | 1.88                        | 1.88  | 1.65  | 1.35  | 1.21  | 0.64  |
|                                                                                             |     | SD | 0.10                        | 0.06  | 0.05  | 0.04  | 0.00  | 0.01  |
| <p>1N</p>                                                                                   | MYR |    | 2.05                        | 2.26  | 2.30  | 1.75  | 1.42  | 1.10  |
|                                                                                             |     | SD | 0.12                        | 0.03  | 0.02  | 0.02  | 0.02  | 0.03  |
|                                                                                             | QUE |    | 0.53                        | 0.30  | 0.28  | 0.28  | 0.24  | 0.24  |
|                                                                                             |     | SD | 0.04                        | 0.00  | 0.00  | 0.01  | 0.00  | 0.00  |
|                                                                                             | ISR |    | 0.00                        | 0.00  | 0.00  | 0.00  | 0.00  | 0.00  |
|                                                                                             |     | SD | 0.00                        | 0.00  | 0.00  | 0.00  | 0.00  | 0.00  |
|                                                                                             | RUT |    | 13.87                       | 10.53 | 12.41 | 7.76  | 7.76  | 10.27 |
|                                                                                             |     | SD | 2.07                        | 0.39  | 0.03  | 0.15  | 0.08  | 0.22  |
|                                                                                             | KEM |    | 0.33                        | 0.25  | 0.21  | 0.19  | 0.20  | 0.19  |
|                                                                                             |     | SD | 0.02                        | 0.01  | 0.01  | 0.02  | 0.00  | 0.01  |
|                                                                                             | ISQ |    | 7.52                        | 6.11  | 7.28  | 2.44  | 1.74  | 3.92  |
|                                                                                             |     | SD | 0.22                        | 0.19  | 0.09  | 0.03  | 0.01  | 0.08  |
|                                                                                             | MAL |    | 14.77                       | 9.74  | 14.79 | 12.65 | 14.84 | 13.58 |
|                                                                                             |     | SD | 0.32                        | 0.19  | 0.34  | 0.05  | 0.09  | 0.35  |
|                                                                                             | AST |    | 1.60                        | 1.91  | 1.63  | 0.85  | 0.93  | 0.98  |
|                                                                                             |     | SD | 0.14                        | 0.09  | 0.08  | 0.07  | 0.05  | 0.05  |
|                                                                                             | MYR |    | 1.92                        | 1.40  | 2.48  | 2.13  | 2.27  | 1.94  |

|                                                                                    |     |     |       |       |       |      |      |      |
|------------------------------------------------------------------------------------|-----|-----|-------|-------|-------|------|------|------|
|   | QUE | SD  | 0.08  | 0.07  | 0.07  | 0.04 | 0.06 | 0.03 |
|                                                                                    |     |     | 0.31  | 0.43  | 0.26  | 0.59 | 0.72 | 0.27 |
|                                                                                    | ISR | SD  | 0.06  | 0.01  | 0.01  | 0.05 | 0.06 | 0.00 |
|                                                                                    |     |     | 0.00  | 0.00  | 0.00  | 0.00 | 0.00 | 0.00 |
|                                                                                    |     |     | 0.00  | 0.00  | 0.00  | 0.00 | 0.00 | 0.00 |
|  |     | SD  |       |       |       |      |      |      |
|                                                                                    | 2N  | RUT | 5.61  | 18.09 | 15.74 | 6.49 | 7.33 | 4.88 |
|                                                                                    |     |     | 0.05  | 0.06  | 0.09  | 0.01 | 0.08 | 0.16 |
|                                                                                    |     | KEM | 0.18  | 0.32  | 0.22  | 0.18 | 0.19 | 0.17 |
|                                                                                    |     |     | 0.00  | 0.01  | 0.00  | 0.00 | 0.01 | 0.00 |
|                                                                                    |     | ISQ | 2.69  | 8.97  | 10.19 | 3.36 | 4.54 | 0.22 |
|                                                                                    |     |     | 0.06  | 0.09  | 0.05  | 0.02 | 0.05 | 0.01 |
|                                                                                    |     | MAL | 6.93  | 20.34 | 16.72 | 6.61 | 6.91 | 3.43 |
|                                                                                    |     |     | 0.05  | 0.08  | 0.46  | 0.05 | 0.11 | 0.03 |
|                                                                                    |     | AST | 0.51  | 1.39  | 1.77  | 0.69 | 0.69 | 0.42 |
|                                                                                    |     |     | 0.02  | 0.01  | 0.01  | 0.03 | 0.01 | 0.01 |
|                                                                                    |     | MYR | 0.95  | 2.73  | 2.55  | 1.11 | 1.19 | 0.69 |
|                                                                                    |     |     | 0.01  | 0.04  | 0.02  | 0.03 | 0.03 | 0.03 |
| 3N                                                                                 |     | QUE | 0.36  | 0.69  | 0.35  | 0.27 | 0.26 | 0.23 |
|                                                                                    |     |     | 0.00  | 0.02  | 0.01  | 0.01 | 0.00 | 0.00 |
|                                                                                    |     | ISR | 0.00  | 0.00  | 0.00  | 0.00 | 0.00 | 0.00 |
|                                                                                    |     |     | 0.00  | 0.00  | 0.00  | 0.00 | 0.00 | 0.00 |
|                                                                                    |     |     | 0.00  | 0.00  | 0.00  | 0.00 | 0.00 | 0.00 |
| 3N                                                                                 |     | RUT | 10.16 | 10.16 | 8.81  | 5.53 | 5.59 | 4.77 |
|                                                                                    |     |     | 0.16  | 0.14  | 0.24  | 0.11 | 0.03 | 0.10 |
|                                                                                    |     | KEM | 0.21  | 0.19  | 0.19  | 0.17 | 0.17 | 0.21 |
|                                                                                    |     |     | 0.01  | 0.01  | 0.01  | 0.00 | 0.01 | 0.01 |
|                                                                                    |     |     |       |       |       |      |      |      |



|                                                                                              |     |    |       |       |       |      |      |      |
|----------------------------------------------------------------------------------------------|-----|----|-------|-------|-------|------|------|------|
|             | ISQ |    | 4.39  | 4.19  | 3.91  | 2.58 | 2.51 | 0.16 |
|                                                                                              |     | SD | 0.08  | 0.19  | 0.09  | 0.07 | 0.17 | 0.01 |
|                                                                                              | MAL |    | 11.99 | 13.12 | 12.71 | 7.60 | 7.97 | 3.81 |
|                                                                                              |     | SD | 0.06  | 0.07  | 0.06  | 0.05 | 0.62 | 0.04 |
|                                                                                              | AST |    | 0.84  | 0.82  | 0.74  | 0.51 | 0.66 | 0.42 |
|                                                                                              |     | SD | 0.01  | 0.07  | 0.05  | 0.01 | 0.07 | 0.01 |
|                                                                                              | MYR |    | 1.76  | 1.73  | 1.72  | 1.14 | 1.08 | 0.74 |
|                                                                                              |     | SD | 0.03  | 0.03  | 0.04  | 0.02 | 0.04 | 0.01 |
| <p>4N</p>  | QUE |    | 0.28  | 0.28  | 0.23  | 0.22 | 0.23 | 0.24 |
|                                                                                              |     | SD | 0.00  | 0.00  | 0.00  | 0.00 | 0.00 | 0.00 |
|                                                                                              | ISR |    | 0.00  | 0.00  | 0.00  | 0.00 | 0.00 | 0.00 |
|                                                                                              |     | SD | 0.00  | 0.00  | 0.00  | 0.00 | 0.00 | 0.00 |
|                                                                                              | RUT |    | 2.49  | 7.44  | 2.64  | 5.18 | 5.15 | 0.95 |
|                                                                                              |     | SD | 0.05  | 0.03  | 0.04  | 0.09 | 0.02 | 0.05 |
|                                                                                              | KEM |    | 0.13  | 0.21  | 0.16  | 0.18 | 0.19 | 0.15 |
|                                                                                              |     | SD | 0.00  | 0.00  | 0.01  | 0.01 | 0.01 | 0.00 |
|                                                                                              | ISQ |    | 0.86  | 3.18  | 1.06  | 2.47 | 2.30 | 0.03 |
|                                                                                              |     | SD | 0.05  | 0.02  | 0.02  | 0.09 | 0.01 | 0.02 |
|                                                                                              | MAL |    | 1.34  | 8.62  | 3.49  | 7.39 | 6.82 | 0.83 |
|                                                                                              |     | SD | 0.02  | 0.07  | 0.06  | 0.18 | 0.10 | 0.06 |
|                                                                                              | AST |    | 0.23  | 1.10  | 0.41  | 0.88 | 0.82 | 0.18 |
|                                                                                              |     | SD | 0.01  | 0.00  | 0.01  | 0.04 | 0.07 | 0.02 |
|                                                                                              | MYR |    | 0.32  | 1.31  | 0.59  | 1.15 | 1.05 | 0.26 |
|                                                                                              |     | SD | 0.01  | 0.00  | 0.01  | 0.04 | 0.00 | 0.01 |
|                                                                                              | QUE |    | 0.24  | 0.30  | 0.22  | 0.28 | 0.26 | 0.22 |
|                                                                                              |     | SD | 0.01  | 0.06  | 0.00  | 0.01 | 0.01 | 0.00 |
|                                                                                              | ISR |    | 0.00  | 0.00  | 0.00  | 0.00 | 0.00 | 0.00 |
|                                                                                              |     | SD | 0.00  | 0.00  | 0.00  | 0.00 | 0.00 | 0.00 |
